# Supplementary material for: Black hydrochromic fluoran molecular switches: substituent positional isomerization effects and multicolor water-jet printing
Source: Royal Society of Chemistry journal article supplement (doi:10.1039/d2tc03279a), 2022-01-01
Supplement: d2tc03279a1.pdf [file d2tc03279a1.pdf]

## **Supporting information**

### **Black Hydrochromic Fluorane Molecular Switches: Substituent Positional Isomerization Effects and Multicolor Water-Jet Printing**

Yu Guan, Xian Liu, Sean Xiao-An Zhang and Lan Sheng\*

State Key Lab of Supramolecular Structure and Materials, College of Chemistry,  
Jilin University, Changchun 130012, People's Republic of China

Corresponding Author: shenglan17@jlu.edu.cn

## Table of contents

|                                                                                                                                                                                                |        |
|------------------------------------------------------------------------------------------------------------------------------------------------------------------------------------------------|--------|
| <b>Methods</b>                                                                                                                                                                                 | P. S3  |
| <b>Fig. S1</b> UV/vis absorption spectrum of hydrochromic and acidochromic properties of ODB and ODB-2.                                                                                        | P. S6  |
| <b>Fig. S2</b> $^1\text{H}$ NMR spectrum of <i>o</i> -NO <sub>2</sub> -ODB-2.                                                                                                                  | P. S7  |
| <b>Fig. S3</b> $^{13}\text{C}$ NMR spectrum of <i>o</i> -NO <sub>2</sub> -ODB-2.                                                                                                               | P. S7  |
| <b>Fig. S4</b> $^1\text{H}$ NMR spectrum of <i>m</i> -NO <sub>2</sub> -ODB-2.                                                                                                                  | P. S8  |
| <b>Fig. S5</b> $^{13}\text{C}$ NMR spectrum of <i>m</i> -NO <sub>2</sub> -ODB-2.                                                                                                               | P. S8  |
| <b>Fig. S6</b> $^1\text{H}$ NMR spectrum of <i>p</i> -NO <sub>2</sub> -ODB-2.                                                                                                                  | P. S9  |
| <b>Fig. S7</b> $^{13}\text{C}$ NMR spectrum of <i>p</i> -NO <sub>2</sub> -ODB-2.                                                                                                               | P. S9  |
| <b>Fig. S8</b> LC-HRMS spectra of <i>o</i> - / <i>m</i> - / <i>p</i> -NO <sub>2</sub> -ODB-2.                                                                                                  | P. S10 |
| <b>Fig. S9</b> UV/vis absorption spectra of <i>o</i> -NO <sub>2</sub> -ODB-2 in MeCN-H <sub>2</sub> O at room temperature and upon heat                                                        | P. S10 |
| <b>Fig. S10</b> Hydrochromic and acidichromic $\epsilon$ at $\lambda_{\text{max}}$ of <i>o</i> -NO <sub>2</sub> -ODB-2.                                                                        | P. S11 |
| <b>Fig. S11</b> Hydrochromic and acidichromic $\epsilon$ at $\lambda_{\text{max}}$ of <i>m</i> -NO <sub>2</sub> -ODB-2.                                                                        | P. S11 |
| <b>Fig. S12</b> Hydrochromic and acidichromic $\epsilon$ at $\lambda_{\text{max}}$ of <i>p</i> -NO <sub>2</sub> -ODB-2.                                                                        | P. S12 |
| <b>Fig. S13</b> Hydrochromic and acidichromic $\epsilon$ at $\lambda_{\text{max}}$ of ODB-2.                                                                                                   | P. S12 |
| <b>Fig. S14</b> The reflective UV-vis spectra of <i>o</i> - / <i>m</i> - / <i>p</i> -NO <sub>2</sub> -ODB-2 and ODB-2 on the filter paper treated with PEG before and after different stimuli. | P. S13 |
| <b>Fig. S15</b> Photographs and UV-vis reflection spectra of <i>o</i> -NO <sub>2</sub> -ODB-2-HM after exposure to various surfactants.                                                        | P. S13 |
| <b>Fig. S16</b> The reflective UV-vis spectra of <i>o</i> -NO <sub>2</sub> -ODB-2-HM after exposure to different volume of water and different concentration.                                  | P. S14 |
| <b>Fig. S17</b> The UV-vis reflection spectra of a 1cm <sup>2</sup> area of <i>o</i> -NO <sub>2</sub> -ODB-2-HM after exposure to different volume of water and different concentration.       | P. S14 |
| <b>Table S1</b> L*, a*, b* values of <i>o</i> -NO <sub>2</sub> -ODB-2-HM before and after different stimuli.                                                                                   | P. S15 |
| <b>Fig. S18</b> Schematic representation of the water-jet rewritable application on <i>o</i> -NO <sub>2</sub> -ODB-2-HM.                                                                       | P. S15 |
| <b>References</b>                                                                                                                                                                              | P. S15 |

## Methods

### 1. Materials and Instruments

The chemical agents and solvents used hereon were purchased from Adamas, Energy Chemical and Aladdin. **Acetonitrile** (CH<sub>3</sub>CN, HPLC) were purchased from Yuwang Group (Shandong, China). Unless otherwise noted, other solvents and reagents were purchased in analytical grade and used without further purification. Deionized water (H<sub>2</sub>O) was purified by Milli-Q system. PEG 20000 (molecular weight: 17,000-22,000) was purchased from Guangfu Fine Chemical Research Institute (Tianjin, China). Cellulose filter paper (Whatman-Xinhua, grade 91, Hangzhou, China) is selected as the paper substrate.

<sup>1</sup>H NMR (400 MHz) and <sup>13</sup>C NMR (101 MHz) spectra were measured in deuterated dimethyl sulfoxide (DMSO-d<sub>6</sub>) on Bruker AVANCE400 using residual solvent peak as an internal reference. LC-HRMS analysis was performed on an Agilent 1290-micro TOF-Q II mass spectrometer. Melting point was determined using a SGW X-4B microscopy melting point apparatus (Shanghai, China). Absorption spectra were measured using a Shimadzu UV-2550 PC double-beam spectrophotometer (path length was 1 cm). Reflective UV/vis spectroscopy and in situ kinetic measurement was tested via reflective mode of integrating sphere on Analytik Jena Specord®210 plus UV/vis spectrophotometer, using barium sulfate as background.

### 2. Synthesis and Characterization

General procedure for the synthesis of *o*- / *m*- / *p*-NO<sub>2</sub>-ODB-2: A solution of 3-(dibutylamino)phenol (13.28 g, 60 mmol) in toluene (120 mL) was added to nitrophthalic anhydride (11.59 g, 60 mmol). The reaction mixture was stirred for 5 h under reflux then cooled to room temperature. The reaction mixture was concentrated under reduced pressure. Then column chromatography was performed using dichloromethane/methanol as eluent to afford the two nitro keto-acid mixture as dark yellow solid (yield: *ca.* 59 %). To a flask charged with concentrated sulfuric acid (30 mL) was added nitro keto-acid (7.75 g) slowly

under argon. The flask was put into ice-water bath and then 4-methoxy-2-methyl-N-phenylaniline (1.93g, 10 mmol) was added slowly. The reaction mixture was stirred at room temperature for one day. The reaction mixture was transferred to ice-water by dropping to give a precipitate. Filtered to get the precipitate and washed with cold water. The precipitate was transferred to a beaker and dispersed with water, and the dispersion was neutralized with 10 wt % sodium hydrate. Extract the dispersion with dichloromethane, dry over anhydrous sodium sulfate, and concentrate at reduced pressure, the mixture was purified by column chromatography on silica gel to give the desired compounds.

**3'-Nitro-2-phenylamino-3-methyl-6-dibutylaminofluoran (*o*-NO<sub>2</sub>-ODB-2).**

The mixture was purified by column chromatography on silica gel (petroleum ether/ethyl acetate = 8 : 1) to afford yellow-green solid (346 mg, yield: 21%). Mp: 224.2 °C - 224.6 °C. <sup>1</sup>H NMR (400 MHz, DMSO-d<sub>6</sub>) δ 8.17 (d, J = 7.8 Hz, 1H), 8.00 (t, J = 7.8 Hz, 1H), 7.68 (d, J = 7.8 Hz, 1H), 7.45 (s, 1H), 7.28 (s, 1H), 7.03 (t, J = 7.7 Hz, 2H), 6.68 - 6.60 (m, 2H), 6.56 - 6.51 (m, 3H), 6.48 - 6.42 (m, 2H), 3.33 - 3.25 (m, 4H), 2.21 (s, 3H), 1.55 - 1.45 (m, 4H), 1.38 - 1.27 (m, 4H), 0.91 (t, J = 7.3 Hz, 6H). <sup>13</sup>C NMR (101 MHz, DMSO-d<sub>6</sub>) δ 163.33, 154.54, 152.40, 149.89, 146.65, 145.64, 145.25, 137.15, 137.07, 135.63, 128.85, 128.56, 124.63, 119.70, 118.77, 118.45, 117.71, 115.72, 114.69, 108.73, 102.73, 96.93, 83.36, 49.87, 28.86, 19.62, 17.91, 13.85. LC-HRMS (ESI) calcd. for C<sub>35</sub>H<sub>36</sub>N<sub>3</sub>O<sub>5</sub> [M+H]<sup>+</sup>: 578.2649, found: 578.2649.

**4'-Nitro-2-phenylamino-3-methyl-6-dibutylaminofluoran (*m*-NO<sub>2</sub>-ODB-2).**

The mixture was purified by column chromatography on silica gel (petroleum ether / ethyl acetate = 10 : 1) to afford green solids (277 mg, yield: 16%). Mp: 108.7 °C - 109.5 °C. <sup>1</sup>H NMR (400 MHz, DMSO-d<sub>6</sub>) δ 8.62 (s, 1H), 8.57 (dd, J = 8.4, 1.7 Hz, 1H), 7.64 (d, J = 8.4 Hz, 1H), 7.43 (s, 1H), 7.29 (s, 1H), 7.01 (t, J = 7.7 Hz, 2H), 6.65 - 6.56 (m, 2H), 6.55 - 6.48 (m, 3H), 6.46 - 6.39 (m, 2H), 3.33 - 3.21 (m, 4H), 2.20 (s, 3H), 1.55 - 1.45 (m, 4H), 1.37 - 1.26 (m, 4H), 0.91 (t, J = 7.3 Hz, 6H). <sup>13</sup>C NMR (101 MHz, DMSO-d<sub>6</sub>) δ 166.71, 157.47, 152.28, 149.93, 149.11,

146.61, 145.38, 137.03, 135.97, 130.40, 128.91, 127.61, 125.97, 120.18, 120.15, 118.82, 118.40, 115.62, 114.54, 108.70, 102.63, 96.95, 84.25, 49.89, 28.89, 19.66, 17.96, 13.90. LC-HRMS (ESI) calcd. for  $C_{35}H_{36}N_3O_5$   $[M+H]^+$ : 578.2649, found: 578.2648.

#### **5'-Nitro-2-phenylamino-3-methyl-6-dibutylaminofluoran (*p*-NO<sub>2</sub>-ODB-2).**

The mixture was purified by column chromatography on silica gel (petroleum ether/ethyl acetate = 10 : 1) to afford orange solid (329 mg, yield: 19%). mp: 92.8 °C - 93.6 °C. <sup>1</sup>H NMR (400 MHz, DMSO-d<sub>6</sub>) δ 8.46 (dd, J = 8.4, 1.9 Hz, 1H), 8.21 (d, J = 8.4, 1H), 8.17 (s, 1H), 7.41 (s, 1H), 7.28 (s, 1H), 6.98 (t, J = 7.8 Hz, 2H), 6.65 - 6.57 (m, 2H), 6.54 (d, J = 7.8 Hz, 2H), 6.48 (s, 1H), 6.46 - 6.38 (m, 2H), 3.33 - 3.26 (m, 4H), 2.21 (s, 3H), 1.55 - 1.45 (m, 4H), 1.38 - 1.27 (m, 4H), 0.91 (t, J = 7.3 Hz, 6H). <sup>13</sup>C NMR (101 MHz, DMSO-d<sub>6</sub>) δ 166.86, 153.31, 152.53, 152.49, 149.89, 146.62, 145.22, 137.00, 135.46, 130.99, 128.94, 128.84, 126.67, 125.59, 119.52, 119.46, 118.81, 118.48, 115.71, 114.73, 108.61, 102.78, 96.97, 84.40, 49.91, 28.90, 19.66, 17.96, 13.90. LC-HRMS (ESI) calcd. for  $C_{35}H_{36}N_3O_5$   $[M+H]^+$ : 578.2649, found: 578.2648.

The detailed NMR and LC-MS spectra of *o*- / *m*- / *p*-NO<sub>2</sub>-ODB-2 are shown in **Fig. S2–S16**.

### **3. Preparation of *o*- / *m*- / *p*-NO<sub>2</sub>-ODB-2-HM**

The hydrochromic materials (HMs) integrated with *o*-/*m*-/*p*-NO<sub>2</sub>-ODB-2 was prepared in a layer-by-layer manner, which referred to our previous work<sup>1</sup>. The filter paper substrate was coated with a layer of 10 wt % PEG aqueous solution and dried at 90 °C. Then *N,N*-Dimethylformamide (DMF) /H<sub>2</sub>O (10/1 by volume) solution of *o*- / *m*- / *p*-NO<sub>2</sub>-ODB-2 (0.02 mol/L) containing 1 wt% PEG is coated over the initial PEG layer, and dried at 90 °C.

### **4. Preparation of water-jet rewritable papers (WJRPs)**

The WJRPs integrated with *o*-NO<sub>2</sub>-ODB-2 was prepared in a layer-by-layer manner. The filter paper substrate was coated with a layer of 10 wt % PEG aqueous solution and dried at 90 °C. Then DMF/H<sub>2</sub>O (10/1 by volume) solution

of *o*-NO<sub>2</sub>-ODB-2 (0.02 mol/L) and various surfactants aqueous solution (0.1 mol/L) containing 1 wt% PEG is coated over the PEG layer, and dried at 90 °C.

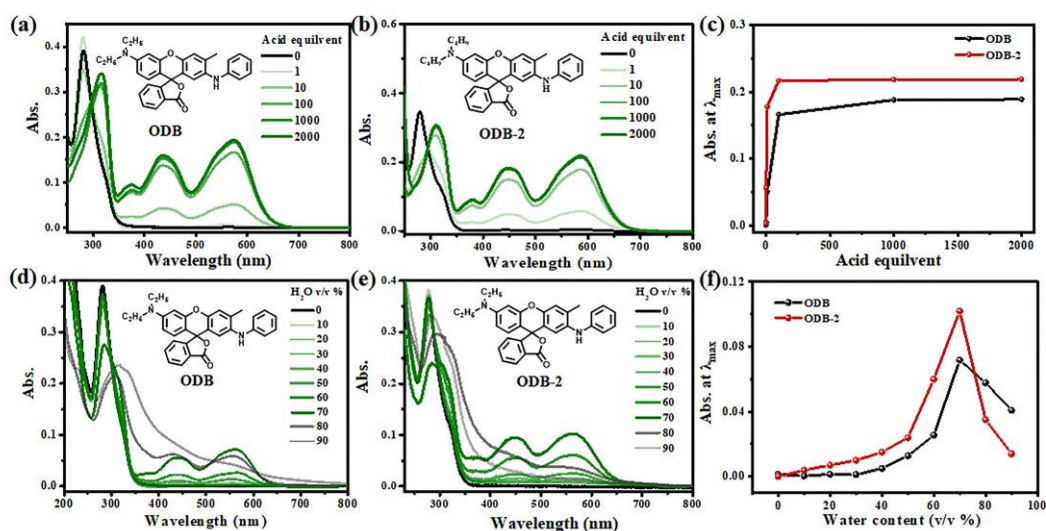

**Fig. S1** UV/vis absorption spectrum of (a, d) ODB-1 and (b, c) ODB-2 in MeCN solution ( $1 \times 10^{-5}$  mol/L) with different equivalent of CF<sub>3</sub>COOH and MeCN-H<sub>2</sub>O binary solutions ( $1 \times 10^{-5}$  mol/L) with increasing percentage of water by volume from 0 to 90% and in MeCN-H<sub>2</sub>O binary solutions with water content of 70% after adding CF<sub>3</sub>COOH. Plots of absorbance at long absorption peak for ODB-1 and ODB-2 in (f) MeCN solution with different equivalent of CF<sub>3</sub>COOH and (f) MeCN-H<sub>2</sub>O binary solutions with increasing percentage of water by volume from 0 to 90%.

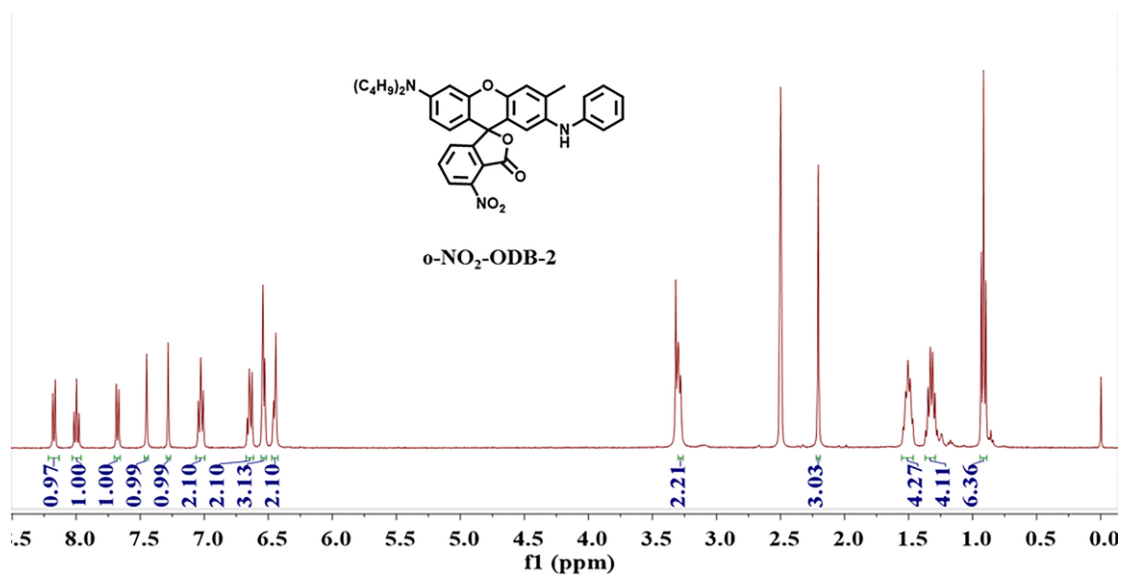

**Fig. S2** <sup>1</sup>H-NMR spectrum of *o*-NO<sub>2</sub>-ODB-2 in deuterated dimethyl sulfoxide (DMSO-*d*<sub>6</sub>) (400 MHz).

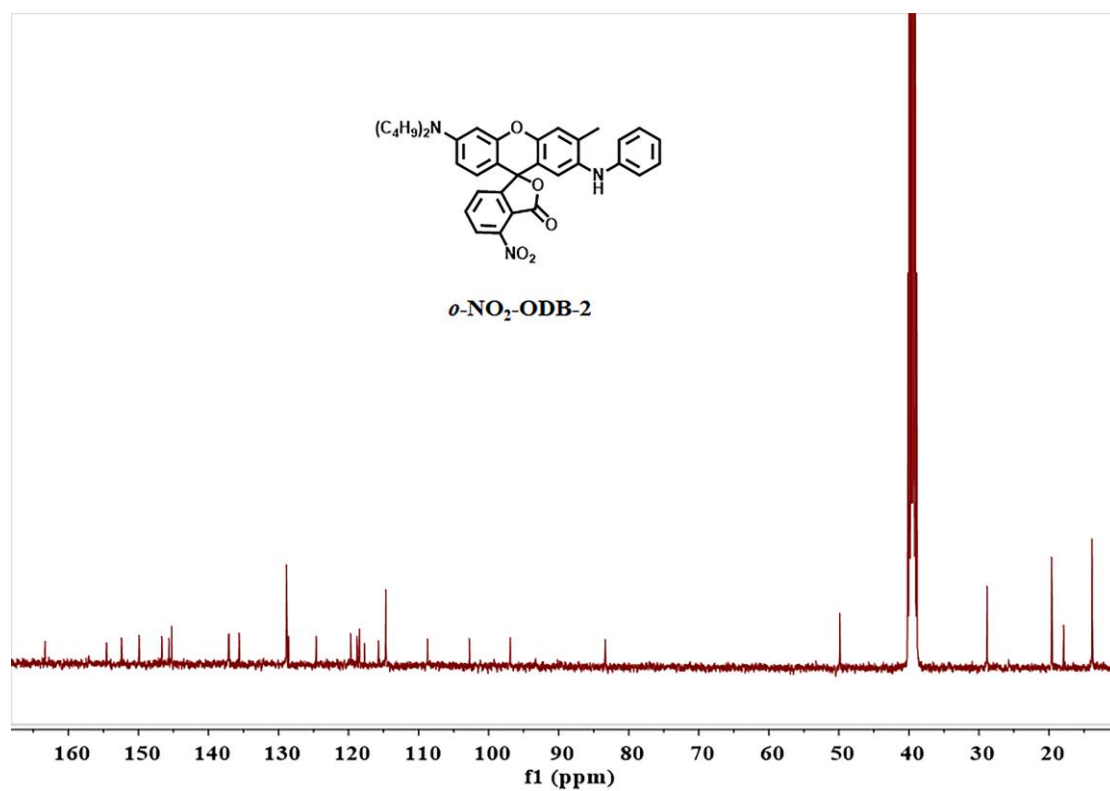

**Fig. S3** <sup>13</sup>C-NMR spectrum of *o*-NO<sub>2</sub>-ODB-2 in DMSO-*d*<sub>6</sub> (400 MHz).

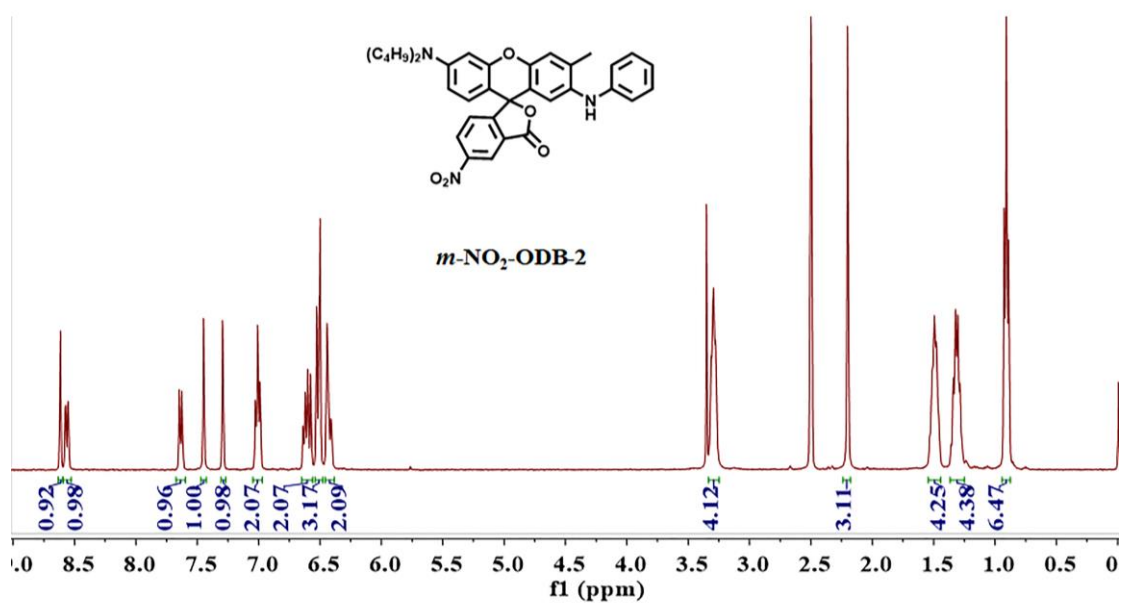

**Fig. S4** <sup>1</sup>H-NMR spectrum of *m*-NO<sub>2</sub>-ODB-2 in DMSO-*d*<sub>6</sub> (400 MHz).

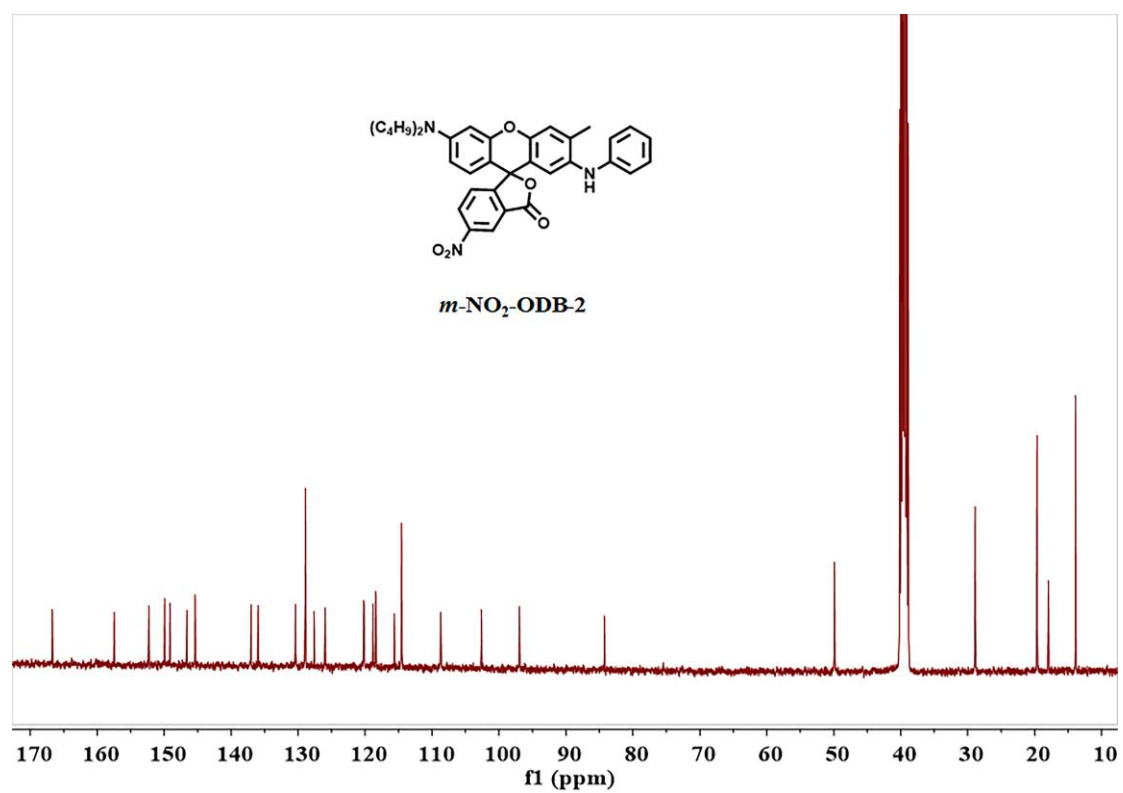

**Fig. S5** <sup>13</sup>C-NMR spectrum of *m*-NO<sub>2</sub>-ODB-2 in DMSO-*d*<sub>6</sub> (400 MHz).



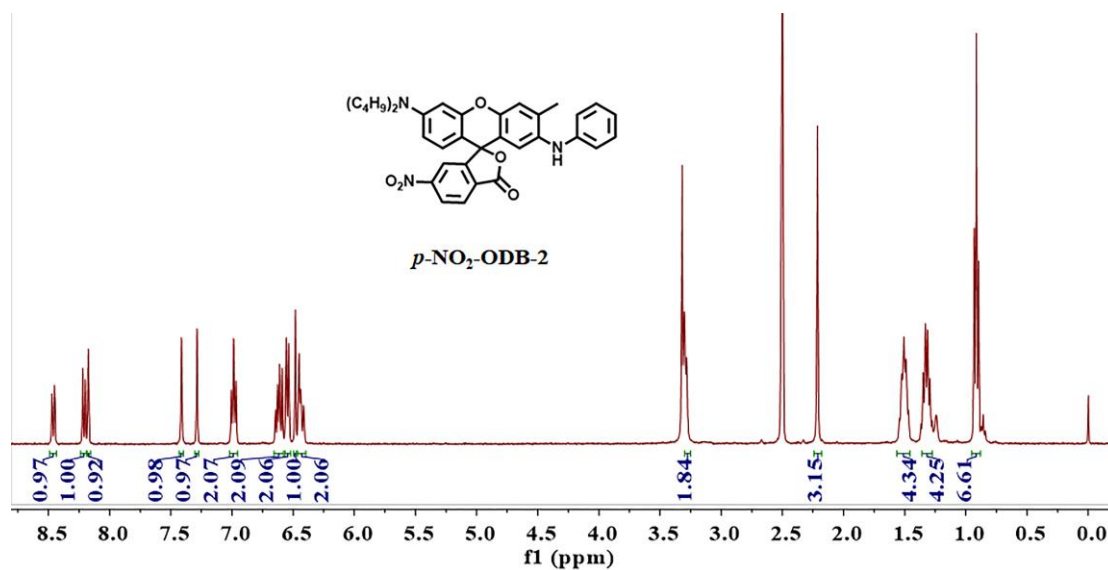

**Fig. S6** <sup>1</sup>H-NMR spectrum of *p*-NO<sub>2</sub>-ODB-2 in DMSO-*d*<sub>6</sub> (400 MHz).

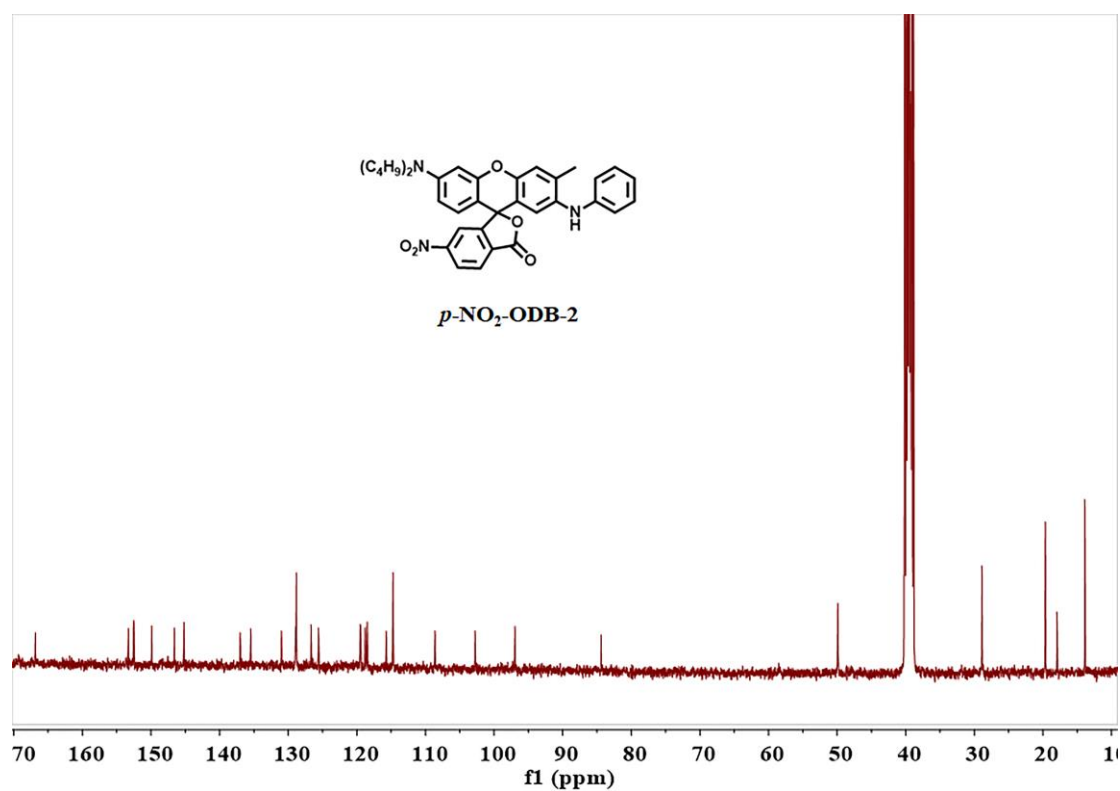

**Fig. S7** <sup>13</sup>C-NMR spectrum of *p*-NO<sub>2</sub>-ODB-2 in DMSO-*d*<sub>6</sub> (400 MHz).

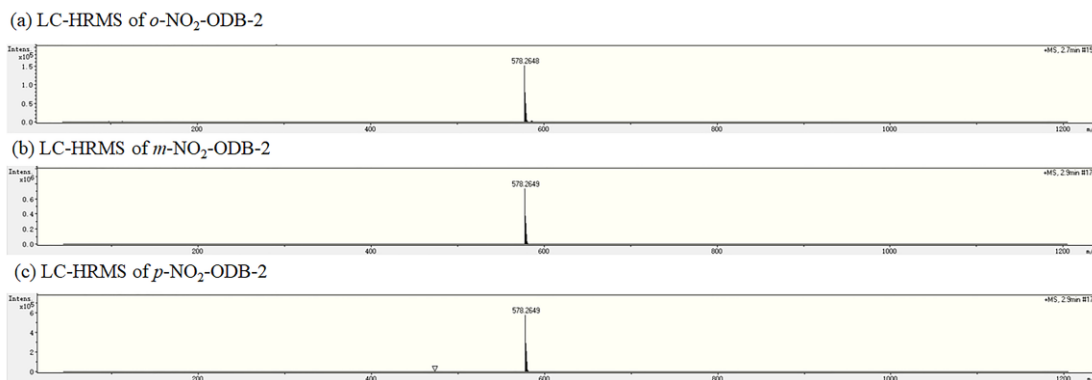

**Fig. S8** LC-HRMS spectra of (a) *o*-NO<sub>2</sub>-ODB-2, (b) *m*-NO<sub>2</sub>-ODB-2, (c) *p*-NO<sub>2</sub>-ODB-2.

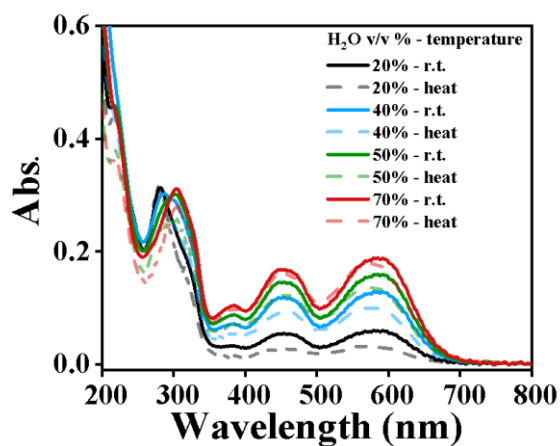

**Fig. S9** UV/vis absorption spectra of *o*-NO<sub>2</sub>-ODB-2 in MeCN-H<sub>2</sub>O binary solutions ( $1 \times 10^{-5}$  mol/L) with water contents of 20%, 40% and 60% (by volume) under room temperature (r. t.: 23.7 °C) and heat ( $75 \pm 2$  °C), respectively.

As shown in **Fig. S9**, after the solutions of *o*-NO<sub>2</sub>-ODB-2 in MeCN-H<sub>2</sub>O with different H<sub>2</sub>O contents (20%, 40%, 70%) were heated (70 °C), their absorbance(s) at 400-600 nm all decreased relative to their absorbance(s) at room temperature (dotted lines vs. solid lines). This result indicates that the proportion of the open form of *o*-NO<sub>2</sub>-ODB-2 was decreased. This is mainly because high temperature destroys the hydrogen bonding between H<sub>2</sub>O and the open form of *o*-NO<sub>2</sub>-ODB-2, which weakens the stabilizing effect of H<sub>2</sub>O on the open form of *o*-NO<sub>2</sub>-ODB-2. And this weakening effect is more obvious with less water content.

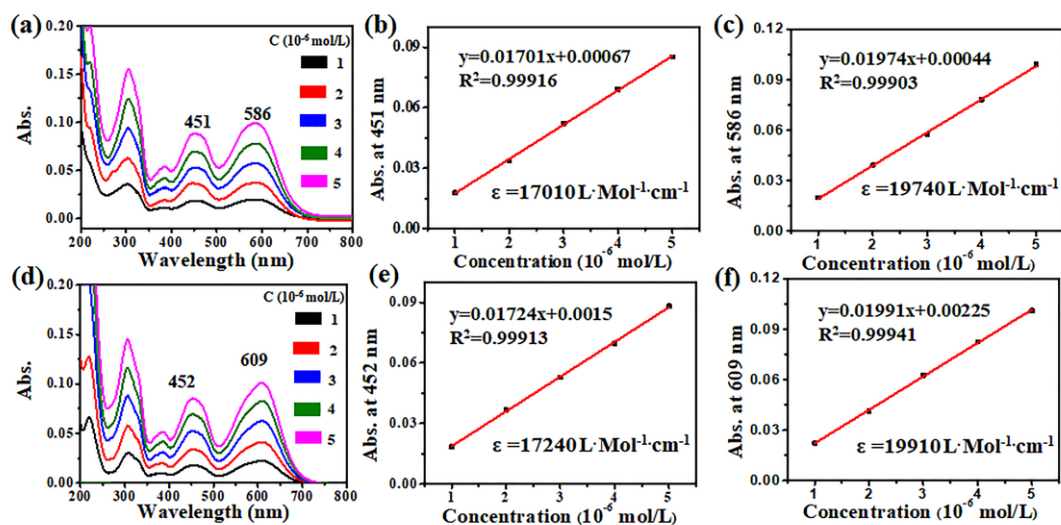

**Fig. S10** UV/vis absorption spectra of *o*-NO<sub>2</sub>-ODB-2 in MeCN/H<sub>2</sub>O (v/v 3/7) with different concentrations (the maximum ring-open form of *o*-NO<sub>2</sub>-ODB-2 is reached which was checked by adding acid) and thus its hydrochromic (a-c) and acidichromic (d-f) molar absorption coefficients ( $\epsilon$ ) at  $\lambda_{\max}$  was obtained according to Lambert-Beer law.

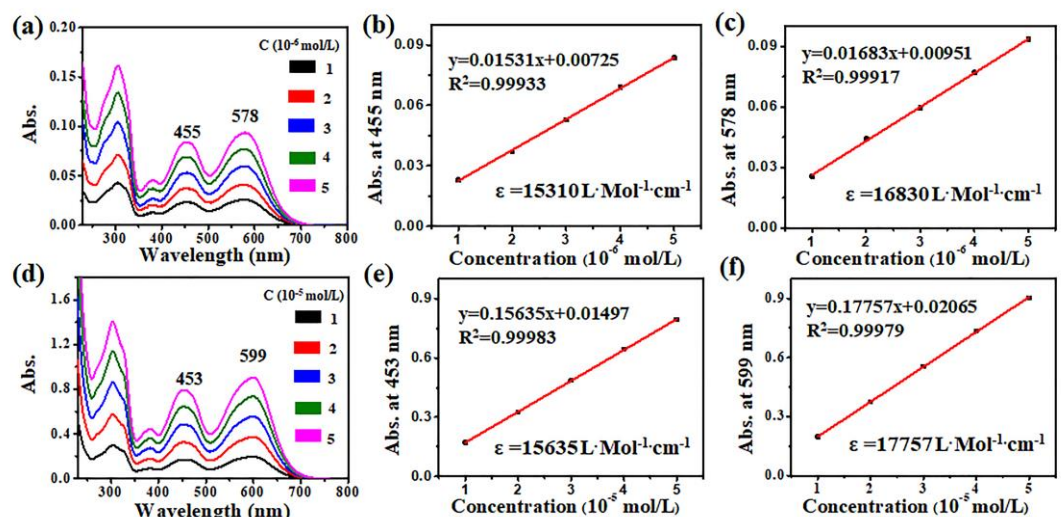

**Fig. S11** UV/vis absorption spectra of *m*-NO<sub>2</sub>-ODB-2 in MeCN/H<sub>2</sub>O (v/v 3/7) with different concentrations (the maximum ring-open form of *m*-NO<sub>2</sub>-ODB-2 is reached which was checked by adding acid) and thus its hydrochromic (a-c) and acidichromic (d-f) molar absorption coefficients ( $\epsilon$ ) at  $\lambda_{\max}$  was obtained according to Lambert-Beer law.

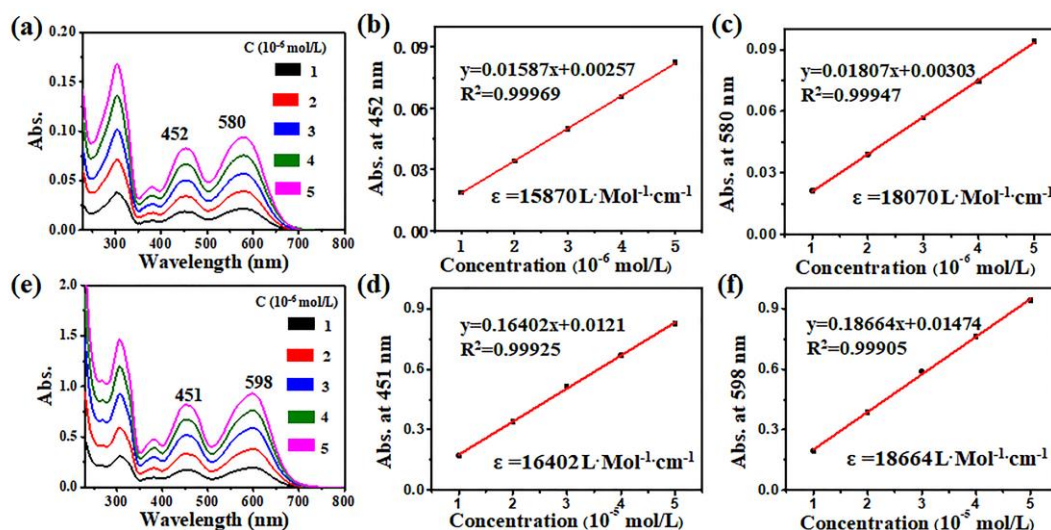

**Fig. S12** UV/vis absorption spectra of *p*-NO<sub>2</sub>-ODB-2 in MeCN/H<sub>2</sub>O (v/v 3/7) with different concentrations (the maximum ring-open form of *p*-NO<sub>2</sub>-ODB-2 is reached which was checked by adding acid) and thus its hydrochromic (a-c) and acidichromic (d-f) molar absorption coefficients ( $\epsilon$ ) at  $\lambda_{\max}$  was obtained according to Lambert-Beer law.

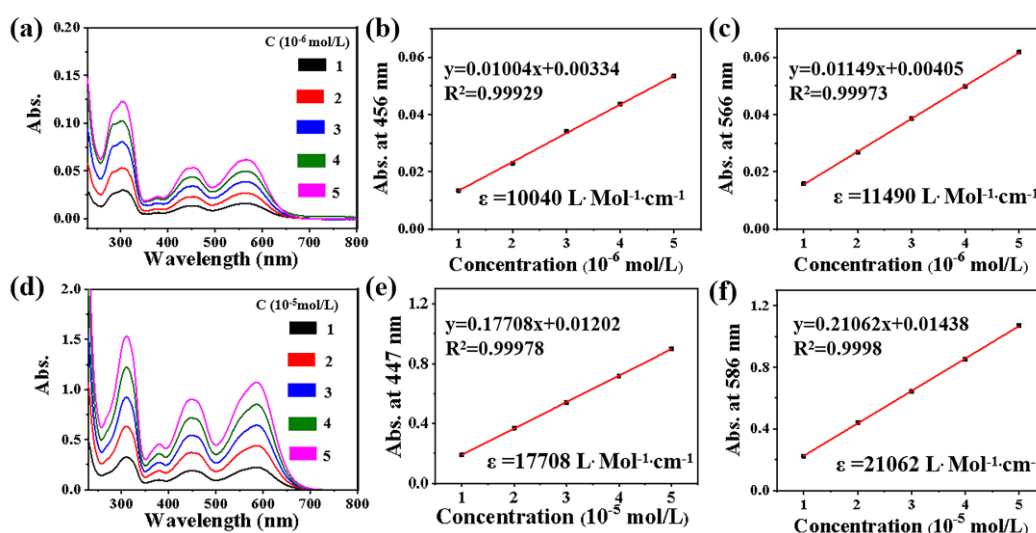

**Fig. S13** UV/vis absorption spectra of ODB-2 in MeCN/H<sub>2</sub>O (v/v 3/7) with different concentrations (the maximum ring-open form of ODB-2 is reached which was checked by adding acid) and thus its hydrochromic (a-c) and acidichromic (d-f) molar absorption coefficients ( $\epsilon$ ) at  $\lambda_{\max}$  was obtained according to Lambert-Beer law.



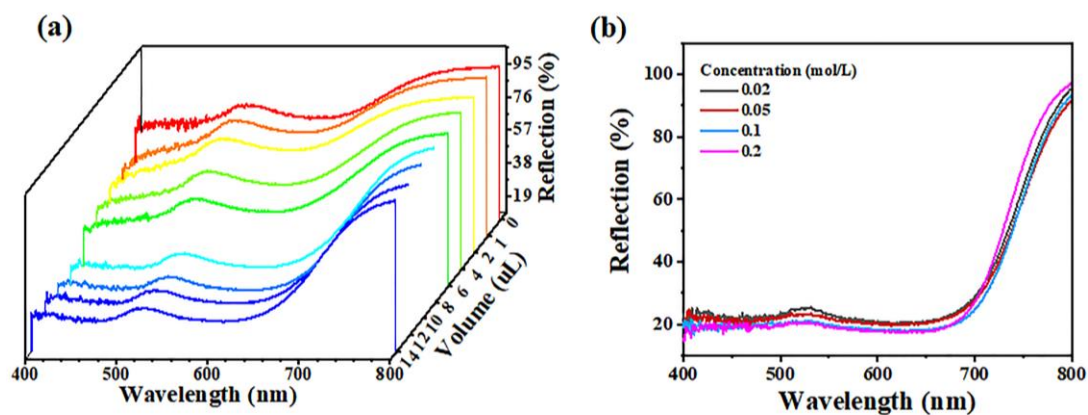

**Fig. S16** The UV-vis reflection spectra of *o*-NO<sub>2</sub>-ODB-2-HM in 1 cm<sup>2</sup> area after exposure to (a) different volume of water and with (b) different concentration.

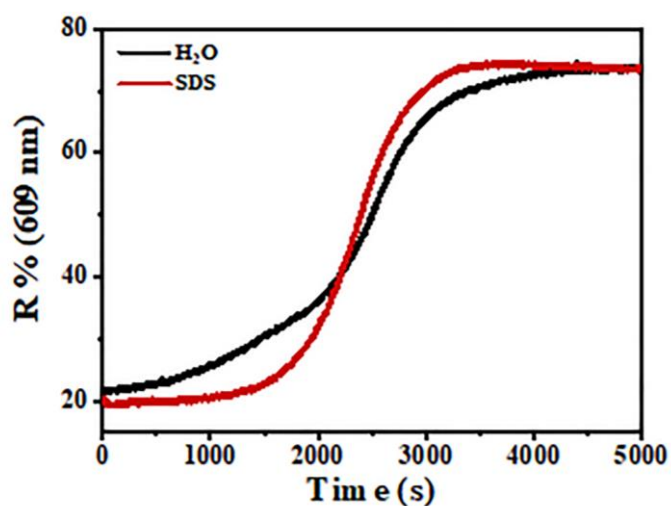

**Fig. S17** Time-dependent reflection variations of the *o*-NO<sub>2</sub>-ODB-2-HM in 1 cm<sup>2</sup> area of at 609 nm after the same amount (10 μL) of water (black line) and SDS aqueous solution (red line).



**Table S1**  $L^*$ ,  $a^*$ ,  $b^*$  values of WJRPs based on the ODB-2 derivatives before and after different stimuli.

| Hydrochromic systems             | Stimulate | $L^*$ | $a^*$ | $b^*$ |
|----------------------------------|-----------|-------|-------|-------|
|                                  | --        | 87.01 | -3.43 | 8.85  |
| <i>o</i> -NO <sub>2</sub> -ODB-2 | water     | 45.71 | -7.66 | 4.17  |
|                                  | SDS aq.   | 22.62 | -1.79 | -0.63 |
| Black ink                        | --        | 30.41 | 0.76  | 1.91  |

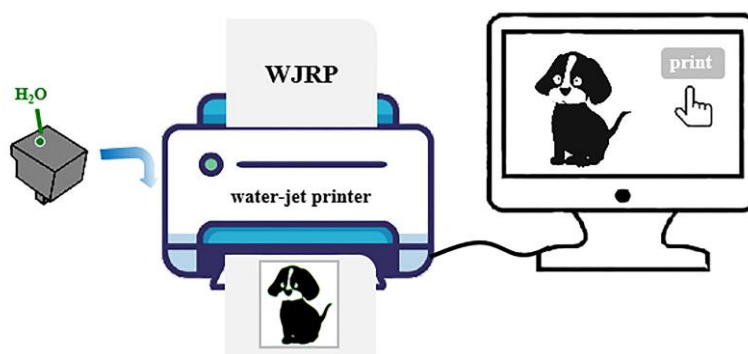

**Fig. S18** Schematic representation of the water-jet rewritable application on *o*-NO<sub>2</sub>-ODB-2 based paper.

## References

S1 L. Sheng, M. Li, S. Zhu, H. Li, G. Xi, Y. Li, Y. Wang, Q. Li, S. Liang, K. Zhong, S. X.-A. Zhang, *Nat. Commun.* 2014, **5**, 3044.
